# Supplementary material for: Human IgG and IgA responses to COVID-19 mRNA vaccines
Source: PubMed Central journal article supplement (PMC8208542; doi:10.1371/journal.pone.0249499), 2021-06-16
Supplement: pone.0249499.s001.pdf [file pone.0249499.s001.pdf]

| Days Post Vaccine | IgG ELISA OD |       |       |       | IgA ELISA OD |       |       |       |
|-------------------|--------------|-------|-------|-------|--------------|-------|-------|-------|
|                   | Subject #    |       |       |       | Subject #    |       |       |       |
|                   | 1            | 2     | 3     | 4     | 1            | 2     | 3     | 4     |
| 0                 | 0.025        |       |       |       | 0.479        |       |       |       |
| 17                | 1.558        |       |       |       | 2.878        |       |       |       |
| 28                | 1.379        |       |       |       | 1.224        |       |       |       |
| 38                | 2.850        |       |       |       | 2.846        |       |       |       |
| 81                | 2.254        |       |       |       | 0.619        |       |       |       |
| 146               | 1.39         |       |       |       | 0.39         |       |       |       |
| 0                 |              | 0.014 |       |       |              | 0.228 |       |       |
| 5                 |              | 0.011 |       |       |              | 0.235 |       |       |
| 8                 |              | 0.062 |       |       |              | 0.731 |       |       |
| 10                |              | 0.216 |       |       |              | 1.205 |       |       |
| 21                |              | 0.930 |       |       |              | 1.333 |       |       |
| 28                |              | 1.113 |       |       |              | 0.774 |       |       |
| 35                |              | 2.980 |       |       |              | 3.49  |       |       |
| 73                |              | 2.286 |       |       |              | 0.941 |       |       |
| 138               |              | 1.436 |       |       |              | 0.832 |       |       |
| 3                 |              |       | 0.052 |       |              |       | 0.213 |       |
| 7                 |              |       | 0.026 |       |              |       | 0.188 |       |
| 15                |              |       | 1.769 |       |              |       | 1.06  |       |
| 21                |              |       | 1.812 |       |              |       | 0.774 |       |
| 27                |              |       | 1.813 |       |              |       | 0.375 |       |
| 35                |              |       | 3.490 |       |              |       | 1.843 |       |
| 40                |              |       | 3.490 |       |              |       | 1.142 |       |
| 48                |              |       | 3.343 |       |              |       | 0.823 |       |
| 131               |              |       | 2.29  |       |              |       | 0.258 |       |
| 2                 |              |       |       | 0.308 |              |       |       | 0.252 |
| 8                 |              |       |       | 0.584 |              |       |       | 0.499 |
| 14                |              |       |       | 2.603 |              |       |       | 2.198 |
| 22                |              |       |       | 2.547 |              |       |       | 1.274 |
| 26                |              |       |       | 3.141 |              |       |       | 2.026 |
| 34                |              |       |       | 3.093 |              |       |       | 1.645 |
| 41                |              |       |       | 3.083 |              |       |       | 1.102 |
| 47                |              |       |       | 3.073 |              |       |       | 1.107 |
| 130               |              |       |       | 2.130 |              |       |       | 0.447 |
